# Supplementary material for: TiO2 microrods with stacked 3D nanovoids for photoelectrochemical water splitting
Source: publisher site journal article supplement (doi:10.1515/pac-2018-1116), 2019-09-08
Supplement: Supplementary file 1 [file pac-2018-1116_suppl.docx]

**Supplementary data for:**

**TiO2 Microrods with Stacked 3D Nanovoids for Photoelectrochemical Water Splitting**

Filip Mamon1,Radek Fajgar2, Vera Jandova2, Eva Koci1, Ivo Jakubec1, Alexander Zhigunov3, Tatjana Brovdyova4 and Snejana Bakardjieva1*

1Institute of Inorganic Chemistry of the CAS, 205 68 Rez, Czech Republic

2Institute of Chemical Process and Fundamentals of the CAS, Rozvojova 2/135, 165 02 Prague, CR

3Institute of Macromolecular Chemistry of the CAS, Heyrovskeho nam.1888/2, 162 00 Prague, Czech Republic;

4Faculty of Mechanical Engineering of the UJEP, Pasteurova 3334/7, 400 96 Usti nad Labem

* The corresponding authors e-mail: [snejana@iic.cas.cz](mailto:snejana@iic.cas.cz)

(Snejana BAKARDJIEVA)

**
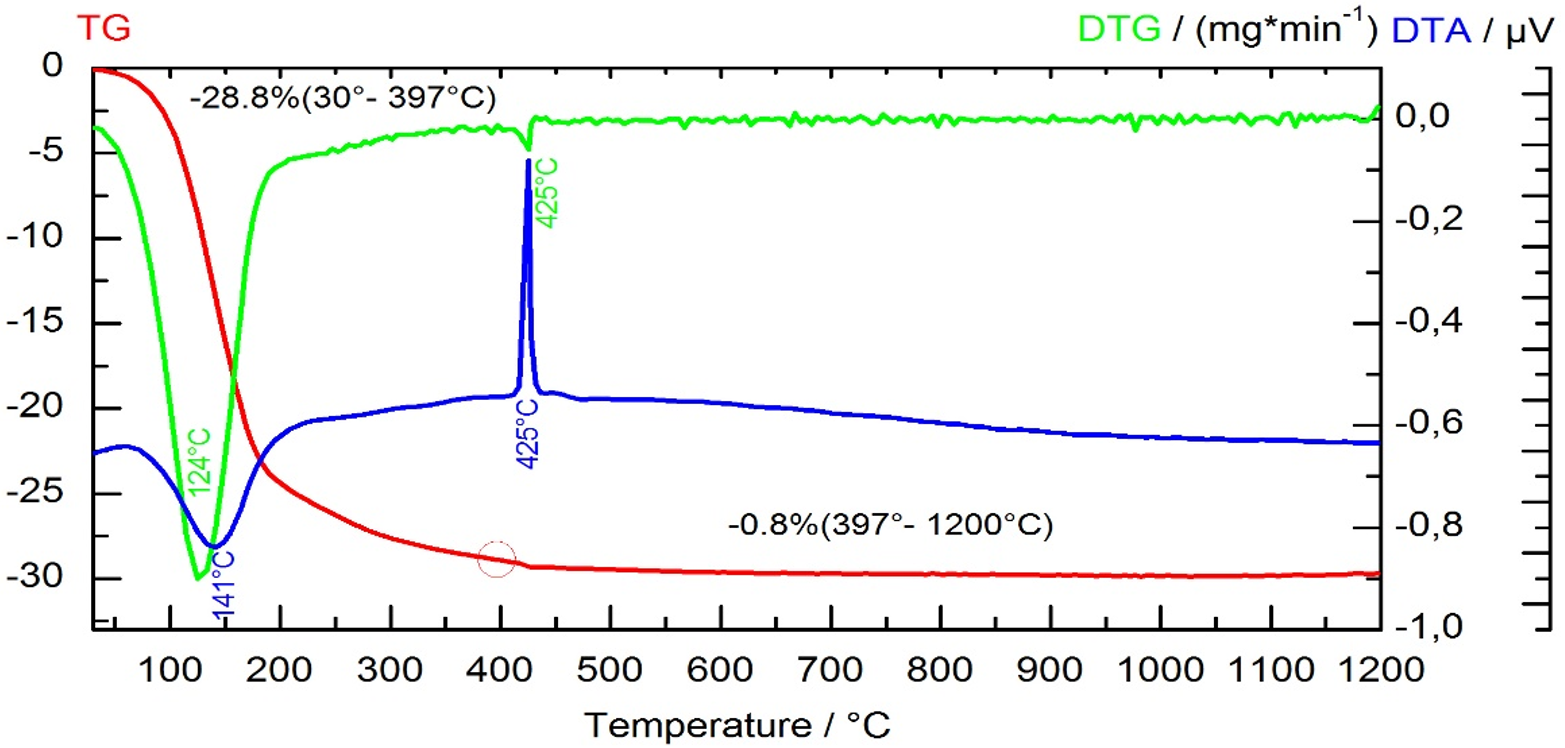
**

**Fig.S1:** TG/DTA of samples 1D TiO/500, 1D TiO/650, 1D TiO/800 and 1D TiO/950


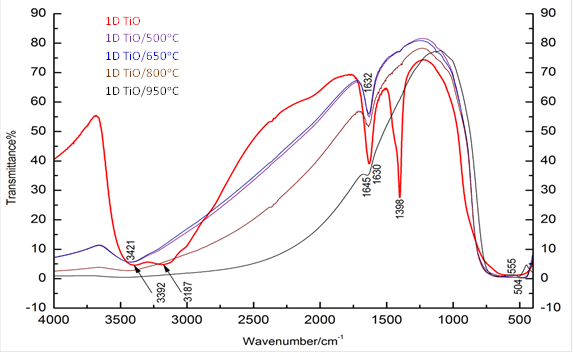


**Fig.S2:** FTIR spectra of the intermediate precursor 1D TiO and annealed samples 1D TiO/500, 1D TiO/650, 1D TiO/800, 1D TiO/950.
